# Supplementary material for: A novel glycolysis-related gene signature for predicting the prognosis of multiple myeloma
Source: Front Cell Dev Biol. 2023 Jun 2;11:1198949. doi: 10.3389/fcell.2023.1198949 (PMC10272536; doi:10.3389/fcell.2023.1198949)
Supplement: Supplementary file 2 [file Table1.XLSX]

## Sheet: Sheet1
glycolysis	24080	4204	136337	final_293
ABCB6	RPS16	RPS16	RPS16	ABCB6
ADORA2B	RPL37A	RPS10	RPS10	ADORA2B
AGL	RPS10	RPL37A	RPS6	AGL
AGRN	RPL23A	RPL23A	RPL23A	AGRN
AK3	RPL13A	RPL13A	RPL13A	AK3
AK4	B2M	B2M	RPS3A	AK4
AKR1A1	RPS6	RPS6	RPS11	AKR1A1
ALDH7A1	RPS23	RPS23	RPL37A	ALDH7A1
ALDH9A1	TPT1	TPT1	RPS23	ALDH9A1
ALDOA	EEF1A1	EEF1A1	RPS19	ALDOA
ALDOB	RPS3A	RPS3A	B2M	ALDOB
ALG1	RPS19	RPL27A	EEF1A1	ALG1
ANG	RPL27A	RPS19	TPT1	ANG
ANGPTL4	RPLP1	RPLP1	RPLP1	ANGPTL4
ANKZF1	RPL41	RPL41	RPL27A	ANKZF1
ARPP19	RPL7A	RPL7A	RPL7A	ARPP19
ARTN	RPS11	RPS11	RPLP2	ARTN
AURKA	ND4	ND4	RPL41	AURKA
B3GALT6	HUWE1	HUWE1	RPL7	B3GALT6
B3GAT1	UBC	HLA-C	COX2	B3GAT1
B3GAT3	HLA-C	RPL7	ND4	B3GAT3
B3GNT3	RPL7	UBC	RPL9	B3GNT3
B4GALT1	COX2	COX2	HUWE1	B4GALT1
B4GALT2	RPL39	RPL39	RPL30	B4GALT2
B4GALT4	RPL31	RPL31	HLA-C	B4GALT4
B4GALT7	RPL9	RPL9	RPL31	B4GALT7
BIK	RPL3	RPL3	RPS20	BIK
BPNT1	RPL30	RPL30	RPL39	BPNT1
CACNA1H	RPS27	RPLP2	RPS27A	CACNA1H
CAPN5	RPLP2	RPS27	SSR4	CAPN5
CASP6	RPL10A	RPL10A	RPL3	CASP6
CD44	SSR4	SSR4	RPL18A	CD44
CDK1	RPS18	RPS18	RPL10A	CDK1
CENPA	RPLP0	RPLP0	RPS27	CENPA
CHPF	RPS14	RPS14	EIF1	CHPF
CHPF2	HLA-B	HLA-B	RPL28	CHPF2
CHST1	RPL18A	RPL18A	RPS21	CHST1
CHST12	RPS20	RPS20	RPS4X	CHST12
CHST2	RPS13	RPS13	RPS29	CHST2
CHST4	RPS27A	RPS27A	RPS13	CHST4
CHST6	RPS4X	RPS4X	FTL	CHST6
CITED2	COX1	RPS29	RPS14	CITED2
CLDN3	RPS29	COX1	RPL37	CLDN3
CLDN9	EIF1	EIF1	UBC	CLDN9
CLN6	RPS15	RPS15	RPLP0	CLN6
COG2	RPS21	RPS21	RPS18	COG2
COL5A1	ATP6	RPL28	COX1	COL5A1
COPB2	RPL28	ATP6	RPS15	COPB2
CTH	RPL13	RPL13	RPL5	CTH
CXCR4	FTL	RPS17	FKBP11	CXCR4
CYB5A	RPS17	FTL	RPL24	CYB5A
DCN	ND2	ND2	RPS12	DCN
DDIT4	RPL34	RPL34	RPL13	DDIT4
DEPDC1	RPS28	RPL37	RPL27	DEPDC1
DLD	RPL37	RPS28	HLA-B	DLD
DPYSL4	RPS12	RPS12	FAU	DPYSL4
DSC2	HSP90B1	HSP90B1	ATP6	DSC2
ECD	EEF1G	EEF1G	HSP90B1	ECD
EFNA3	FKBP11	FKBP11	EEF1B2	EFNA3
EGFR	ACTB	RPL8	RPL34	EGFR
EGLN3	RPS2	ACTB	RPS17	EGLN3
ELF3	RPL8	RPS2	ND2	ELF3
ENO1	HLA-A	RPS3	RPS28	ENO1
ENO2	RPL32	HLA-A	RPL8	ENO2
ERO1A	RPS3	RPL32	EEF1G	ERO1A
EXT1	RPL27	RPL27	NACA	EXT1
EXT2	EEF1B2	EEF1B2	EEF2	EXT2
FAM162A	RPL38	RPL38	ACTG1	FAM162A
FBP2	PPIA	PPIA	RPS2	FBP2
FKBP4	NACA	NACA	RPS3	FKBP4
FUT8	EEF2	EEF2	RPL19	FUT8
G6PD	FAU	FAU	PPIA	G6PD
GAL3ST1	ACTG1	ACTG1	RPL38	GAL3ST1
GALE	RPS24	RPS24	RPS8	GALE
GALK1	RPL35	RPL18	HLA-A	GALK1
GALK2	RPL18	RPL35	RPL18	GALK2
GAPDHS	RPL24	RPL24	RPL35	GAPDHS
GCLC	RPL10	RPL12	RPL32	GCLC
GFPT1	RPL12	RPL19	ACTB	GFPT1
GFUS	RPL19	RPL10	RPL4	GFUS
GLCE	RPL5	RPL4	RPS24	GLCE
GLRX	RPL4	RPL5	SEC61B	GLRX
GMPPA	UBB	UBB	RPS15A	GMPPA
GMPPB	GNAS	RPL22	RPL29	GMPPB
GNE	RPL29	HNRNPA1	RPL35A	GNE
GNPDA1	RPL22	GNAS	SPCS1	GNPDA1
GOT1	HNRNPA1	RPL29	RPL12	GOT1
GOT2	RPS15A	RACK1	HSPA5	GOT2
GPC1	RACK1	SPCS1	RPL10	GPC1
GPC3	SPCS1	RPS15A	UBB	GPC3
GPC4	RPS8	RPS8	HSPA8	GPC4
GPR87	HSPA5	HSPA5	HNRNPA1	GPR87
GUSB	OAZ1	HSPA8	RPL22	GUSB
GYS1	HSPA8	OAZ1	RPS25	GYS1
GYS2	UBA52	UBA52	GNAS	GYS2
HAX1	SPCS2	SPCS2	RACK1	HAX1
HDLBP	RPSA	RPSA	RPS7	HDLBP
HK2	SEC61B	SEC61B	RPS9	HK2
HMMR	TMEM258	TMEM258	HERPUD1	HMMR
HOMER1	RPS7	RPS7	OAZ1	HOMER1
HS2ST1	MALAT1	RPS9	RPSA	HS2ST1
HS6ST2	RPS9	TXNIP	UBA52	HS6ST2
HSPA5	TXNIP	MALAT1	SPCS2	HSPA5
IDH1	RPL35A	RPL35A	RPN2	IDH1
IDUA	RPN2	PABPC1	TMEM258	IDUA
IER3	HERPUD1	HERPUD1	PRDX4	IER3
IGFBP3	PABPC1	RPN2	JCHAIN	IGFBP3
IL13RA1	RPS5	RPL11	SUB1	IL13RA1
IRS2	JCHAIN	RPS5	RPL23	IRS2
ISG20	RPL11	SERP1	RPL11	ISG20
KDELR3	SERP1	JCHAIN	RPS5	KDELR3
KIF20A	POU2AF1	POU2AF1	PABPC1	KIF20A
KIF2A	XBP1	XBP1	POU2AF1	KIF2A
LCT	RPL23	RPS25	SRGN	LCT
LDHA	RPS25	P4HB	XBP1	LDHA
LDHC	DUSP1	RPL23	DNAJB9	LDHC
LHPP	P4HB	DNAJB9	NPM1	LHPP
LHX9	DNAJB9	DUSP1	PABPC3	LHX9
MDH1	NPM1	CLPTM1L	EIF4A2	MDH1
MDH2	CLPTM1L	NPM1	TMSB10	MDH2
ME1	PRDX4	PRDX4	TRAM1	ME1
ME2	SRGN	SRGN	DDX5	ME2
MED24	SUB1	SUB1	HLA-E	MED24
MERTK	GAPDH	GAPDH	RPL15	MERTK
MET	NOP53	NOP53	TXNIP	MET
MIF	SDC1	SDC1	NOP53	MIF
MIOX	EIF4A2	EIF4A2	CLPTM1L	MIOX
MPI	MZB1	MZB1	SERP1	MPI
MXI1	HLA-E	HLA-E	TMED2	MXI1
NANP	TRAM1	TRAM1	DUSP1	NANP
NASP	PABPC3	DDX5	CALM2	NASP
NDST3	DDX5	CALM2	PPIB	NDST3
NDUFV3	CALM2	PABPC3	P4HB	NDUFV3
NOL3	TMSB10	PPIB	SEC11C	NOL3
NSDHL	TMED2	TMED2	SSR3	NSDHL
NT5E	PPIB	TMSB10	MZB1	NT5E
P4HA1	JUND	JUND	TNFRSF17	P4HA1
P4HA2	PTPRO	PTPRO	KRTCAP2	P4HA2
PAM	SEC11C	SEC11C	EEF1D	PAM
PAXIP1	TRIB1	TRIB1	ITM2B	PAXIP1
PC	SSR3	JTB	ATP5F1A	PC
PDK3	JTB	SSR3	JTB	PDK3
PFKFB1	PTMA	TNFRSF17	RPS27L	PFKFB1
PFKP	CYBA	PTMA	DNAJC1	PFKP
PGAM1	TNFRSF17	CYBA	RPL14	PGAM1
PGAM2	DNAJC1	PDIA6	TENT5C	PGAM2
PGK1	PDIA6	DNAJC1	RPS26	PGK1
PGLS	CD53	CD53	TRIB1	PGLS
PGM2	TENT5C	RPS27L	PTMA	PGM2
PHKA2	SSR1	TENT5C	PDIA6	PHKA2
PKM	RPS27L	SSR1	CYBA	PKM
PKP2	ITM2B	HLA-G	CD53	PKP2
PLOD1	MCL1	MCL1	PSAP	PLOD1
PLOD2	HLA-G	ITM2B	GAPDH	PLOD2
PMM2	ATP5F1A	ATP5F1A	SSR1	PMM2
POLR3K	VIM	VIM	UBE2J1	POLR3K
PPFIA4	RPL14	EEF1D	METTL7A	PPFIA4
PPIA	EEF1D	CANX	MCL1	PPIA
PPP2CB	CANX	METTL7A	RPL36	PPP2CB
PRPS1	PSAP	RPL14	TMEM59	PRPS1
PSMC4	METTL7A	PSAP	ATP5MG	PSMC4
PYGB	RPL15	RPL15	ATF4	PYGB
PYGL	UBE2J1	UBE2J1	MTDH	PYGL
QSOX1	CD63	CD63	RHOA	QSOX1
RARS1	ATF4	ATF4	SEL1L	RARS1
RBCK1	H3-3B	TMEM59	SPCS3	RBCK1
RPE	TMEM59	H3-3B	SUMO2	RPE
RRAGD	KRTCAP2	KRTCAP2	ATP5F1E	RRAGD
SAP30	RPS26	RPS26	EIF3E	SAP30
SDC1	RHOA	RHOA	CANX	SDC1
SDC2	CFL1	DDOST	CD63	SDC2
SDC3	DDOST	CFL1	TMBIM6	SDC3
SDHC	EIF4G2	EIF4G2	TMA7	SDHC
SLC16A3	ITM2C	ITM2C	CDV3	SLC16A3
SLC25A10	SEL1L	SPCS3	SEC62	SLC25A10
SLC25A13	SPCS3	SEL1L	MALAT1	SLC25A13
SLC35A3	TMBIM6	TMBIM6	EIF3L	SLC35A3
SLC37A4	CDV3	SUMO2	HLA-G	SLC37A4
SOD1	SUMO2	CDV3	SDC1	SOD1
SOX9	TSC22D3	TSC22D3	COX7C	SOX9
SPAG4	CYCS	CYCS	JUND	SPAG4
SRD5A3	IGKC	CXCR4	CYCS	SRD5A3
STC1	CXCR4	EIF3E	BTF3	STC1
STC2	EIF3E	BTG2	EIF4G2	STC2
STMN1	BTG2	LDHA	SLC25A6	STMN1
TALDO1	CD74	CD74	H3-3B	TALDO1
TFF3	LDHA	ST6GAL1	VIM	TFF3
TGFA	ST6GAL1	IGKC	CXCR4	TGFA
TGFBI	ATP6V0E1	ATP6V0E1	MYL6	TGFBI
TKTL1	BTF3	BTF3	ITM2C	TKTL1
TPBG	EIF3L	EIF3L	COX5A	TPBG
TPI1	RPL36	COX5A	DDOST	TPI1
TPST1	COX5A	GLCCI1	HSPD1	TPST1
TXN	ATP5MG	RPL36	HINT1	TXN
UGP2	GLCCI1	HSPD1	FTH1P5	UGP2
VCAN	ATP5F1E	MIF	SERF2	VCAN
VEGFA	HSPD1	ATP5MG	TPD52	VEGFA
VLDLR	DDX17	ATP5F1E	GLCCI1	VLDLR
XYLT2	MIF	DDX17	TXNDC15	XYLT2
ZNF292	CUTA	CUTA	ERLEC1	ZNF292
ACSS1	TXNDC15	TXNDC15	DYNLL1	ACSS1
ACSS2	TMA7	TMA7	ARF4	ACSS2
ADH1A	SEC62	SEC62	DDX17	ADH1A
ADH1B	CREB3L2	CREB3L2	ATP6V0E1	ADH1B
ADH1C	ARF4	RAB1A	RPL36AL	ADH1C
ADH4	RAB1A	ARF4	MIF	ADH4
ADH5	MTDH	TMED10	CKAP4	ADH5
ADH6	TMED10	MTDH	PTPRO	ADH6
ADH7	DNAJB11	DNAJB11	TMBIM4	ADH7
ALDH1A3	PARK7	PARK7	DNAJB11	ALDH1A3
ALDH1B1	LMAN1	SLC25A6	TMED10	ALDH1B1
ALDH2	SLC25A6	LMAN1	EVI2B	ALDH2
ALDH3A1	NCL	NCL	SSR2	ALDH3A1
ALDH3A2	ERLEC1	TPD52	STT3B	ALDH3A2
ALDH3B1	TPD52	LDHB	COMMD3	ALDH3B1
ALDH3B2	LDHB	ERLEC1	HSP90AA1	ALDH3B2
G6PC2	MORF4L2	DYNLL1	PTGES3	G6PC2
GALM	SERF2	STT3B	CUTA	GALM
LDHAL6A	DYNLL1	HLA-F	SLAMF7	LDHAL6A
PCK2	TRMT112	TRMT112	ISCU	PCK2
PDHA2	HLA-F	MORF4L2	TRMT112	PDHA2
PDHB	SRPRA	SERF2	CHCHD2	PDHB
PGAM4	STT3B	SRPRA	JUN	PGM1
PGM1	HINT1	PTGES3	LDHA	AAAS
AAAS	PTGES3	HINT1	ST6GAL1	ADPGK
ADPGK	COX7C	COX7C	COX7A2	ALDOC
ALDOC	MYL6	ARF1	PARK7	BPGM
BPGM	TMBIM4	ZBTB38	FAM120A	ENO3
ENO3	ARF1	MYL6	BMI1	GAPDH
GAPDH	ZBTB38	TMBIM4	MORF4L2	GCK
GCK	HSP90AA1	HSP90AA1	SELENOK	GCKR
GCKR	CHCHD2	RNASET2	RAB1A	GNPDA2
GNPDA2	ISCU	ISCU	NDUFA1	GPI
GPI	RNASET2	CHCHD2	TSC22D3	HK1
HK1	CKAP4	ANP32B	ZBTB38	HK3
HK3	ANP32B	RPL36AL	TMEM230	NDC1
NDC1	TUBA1B	CKAP4	SELENOS	NUP107
NUP107	JUN	IRF4	HLA-F	NUP133
NUP133	RPL36AL	PCBP2	CREB3L2	NUP153
NUP153	HMGB1	TUBA1B	LDHB	NUP155
NUP155	IRF4	JUN	LMAN1	NUP160
NUP160	PCBP2	SSR2	CFL1	NUP188
NUP188	SSR2	ACTR3	CNBP	NUP205
NUP205	ACTR3	HMGB1	ATP5MK	NUP210
NUP210	EVI2B	EVI2B	YBX1	NUP214
NUP214	COX4I1	CD48	COX6A1	NUP35
NUP35	CD48	COX4I1	EIF3F	NUP37
NUP37	COX7A2	COX7A2	COX4I1	NUP42
NUP42	SELENOS	SELENOS	UQCRH	NUP43
NUP43	TMEM230	TMEM230	CD48	NUP50
NUP50	HYOU1	FXYD5	IGKC	NUP54
NUP54	BMI1	BMI1	PCBP2	NUP58
NUP58	FXYD5	HYOU1	BTG2	NUP62
NUP62	NDUFA1	IFITM1	NDUFB4	NUP85
NUP85	FTH1P5	NDUFA1	ELL2	NUP88
NUP88	COMMD3	H2BC12	PSMB1	NUP93
NUP93	SELENOK	COMMD3	UQCRQ	NUP98
NUP98	IFITM1	COX6A1	HMGB1	PFKFB2
PFKFB2	GABARAP	GABARAP	HMGN2	PFKFB3
PFKFB3	COX6A1	SELENOK	SKP1	PFKFB4
PFKFB4	H2BC12	SELENOT	IFITM1	PFKL
PFKL	FAM120A	FTH1P5	NORAD	PFKM
PFKM	HMGN2	FAM120A	PNN	PGK2
PGK2	ELL2	HMGN2	ANP32B	PGM2L1
PGM2L1	NORAD	NORAD	ACTR3	PGP
PGP	SELENOT	ELL2	ARF1	PKLR
PKLR	CRELD2	TP53INP1	C1orf43	POM121
POM121	MYDGF	PRDM1	NCL	PPP2CA
POM121C	TP53INP1	MYDGF	UQCRB	PPP2R1A
PPP2CA	UQCRH	CRELD2	RNASET2	PPP2R1B
PPP2R1A	PRDM1	UQCRH	SELENOT	PPP2R5D
PPP2R1B	SLAMF7	SLAMF7	ZNF706	PRKACA
PPP2R5D	COPB1	COPB1	CD74	PRKACB
PRKACA	SRP14	SRP14	PGK1	PRKACG
PRKACB	CNBP	CNBP	PABPC4	RAE1
PRKACG	C1orf43	C1orf43	TM9SF2	RANBP2
RAE1	TM9SF2	TM9SF2	GABARAP	SEC13
RANBP2	UQCRQ	UQCRQ	ATRAID	SEH1L
SEC13	NDUFB4	NDUFB4	SNHG5	TPR
SEH1L	KDELR1	KDELR1	PLPP5	MPC1
TPR	MATR3	MATR3	SRP14	MPC2
MPC1	YBX1	SLC25A3	SRP9	SLC2A1
MPC2	PABPC4	YBX1	COX6C	SLC2A2
SLC2A1	SLC25A3	SKP1	MATR3	SLC2A3
SLC2A2	ERP29	ERP29	PDIA3	SLC2A4
SLC2A3	SKP1	PABPC4	CRELD2	SLC2A5
SLC2A4	UQCRB	UQCRB	OSTC	DLAT
SLC2A5	HNRNPK	HNRNPK	PECAM1	FBP1
DLAT	EIF3F	PGK1	COPB1	G6PC1
FBP1	PNN	PNN	MANF	LDHAL6B
G6PC1	DUSP5	DUSP5	ATP6V1G1	LDHB
LDHAL6B	PDK1	EIF3F	PRDM1	PCK1
LDHB	PGK1	ATP5MK	IRF4	PDHA1
PCK1	ATP5MK	PHB2	SNRPD2
PDHA1	PECAM1	PDK1	MYDGF
	PHB2	RABAC1	ARPC2
	RABAC1	COX6C	DERL3
	DERL3	PECAM1	H2BC12
	COX6C	PALM2AKAP2	HNRNPK
	PALM2AKAP2	SLC25A5	UQCR11
	PLPP5	PLPP5	ICAM3
	SLC25A5	RHOB	FAM3C
	ZNF706	ATRAID	UBE2D3
	ATRAID	DERL3	SLC25A3
	RHOB	ZNF706	ERP29
	MANF	MANF	SRSF3
	FOXO3	FOXO3	PDK1
	TUBA1C	CLTC	SLC25A5
	CLTC	TUBA1C	TUBA1B
	UAP1	MAN2A1	SARAF
	PSMB1	UAP1	OST4
	FAM3C	ATP5PD	ATP5MC3
	MAN2A1	PSMB1	UAP1
	IGKV1D-13	SNHG5	SOD1
	ATP5PD	FAM3C	BTG1
	SNHG5	ODC1	SET
	ATP6V1G1	GOLM2	PALM2AKAP2
	ODC1	ATP5F1B	SLC38A2
	ICAM3	ATP6V1G1	EIF3K
	ATP5F1B	SOD1	ATP5PF
	SOD1	ATP5MC3	TP53INP1
	GOLM2	ICAM3	MAN1A1
	ATP5MC3	HNRNPA2B1	H2AZ1
	HNRNPA2B1	CPNE5	CD164
	CPNE5	PPP1CC	PHB2
	PPP1CC	NDUFC2	LAPTM4A
	NDUFC2	SRP9	YWHAB
	SRP9	DDIT4	MAN2A1
	MRFAP1	BTG1	HNRNPA2B1
	BTG1	IGKV1D-13	NDUFC2
	TBC1D9	MRFAP1	MRFAP1
	MAN1A1	TBC1D9	ATP5PO
	OSTC	MAN1A1	CAPN2
	PDIA3	OSTC	UBE2E1
	NEAT1	PDIA3	HNRNPH1
	ARPC2	HIPK2	RABAC1
	HIPK2	H1-10	IGKV1D-13
	DDIT4	NEAT1	PPP1CC
	HSP90AB1	HSP90AB1	EAF2
	KLF2	ARPC2	KDELR2
	PSME2	DERL1	CLTC
	ATP5MJ	ATP5MJ	TBCA
	CD164	KLF2	NAP1L1
	DERL1	TSPAN3	FOXO3
	ATP5PF	ATP5PF	GOLM2
	TSPAN3	CD164	REEP5
	H1-10	CAPN2	DERL1
	CAPN2	PSME2	MMADHC
	OST4	H2AZ1	SNHG6
	H2AZ1	OST4	RPN1
	ERGIC3	YWHAZ	PTP4A2
	SNRPD2	ERGIC3	IARS1
	YWHAZ	EIF3K	NDUFA4
	KDELR2	SNRPD2	PSME2
	GAS5	RAC2	GLRX
	IARS1	CSDE1	CAPZA1
	RAC2	IARS1	ATP5F1B
	EIF3K	RPN1	SNX3
	IGLL3P	GAS5	CSDE1
	GUSBP11	KDELR2	ATP5PD
	RPN1	UBE2D3	UQCRFS1
	CSDE1	SLC38A2	DUSP5
	UBE2D3	ATP5PO	SEL1L3
	EAF2	SRSF3	ODC1
	SLC38A2	EAF2	SEC61G
	SRSF3	LAPTM4A	PSMA1
	ATP5PO	PCBP1	SRPRA
	UQCR11	GUSBP11	CLIC1
	PCBP1	REEP5	TMED5
	LAPTM4A	UQCR11	PFDN5
	SEL1L3	SNX3	CCNI
	SNX3	UQCRFS1	GOLPH3
	REEP5	NONO	KLF2
	CD38	UBE2E1	IRAK1
	ADA2	CD38	NDUFAB1
	NONO	IGLL3P	TBC1D9
	UBE2E1	ADA2	ATP5MJ
	UQCRFS1	CD47	GUSBP11
	EPOR	SEL1L3	CIAO2A
	CD47	MMADHC	MAGT1
	FNDC3B	CCNI	TSPAN3
	MMADHC	SEC61G	HIPK2
	CCNI	EPOR	EIF2AK3
	SEC61G	FNDC3B	TXN
	COX3	CD59	PSMA2
	CD59	COX3	ERH
	PSMA1	PSMA1	CD38
	SURF4	ERH	MGAT2
	ERH	SURF4	MEF2C
	PRKD2	STUB1	YWHAZ
	STUB1	PRKD2	CD59
	GLRX	NAP1L1	FXYD5
	ANAPC13	GOLPH3	ATP5MC2
	GOLPH3	ANAPC13	NEAT1
	NAP1L1	TBCA	PSMB4
	HMGN1	HMGN1	TRA2B
	TBCA	NDUFA4	PPA1
	YWHAB	RTN4	CLIC4
	YWHAG	YWHAG	YWHAQ
	NDUFA4	CLIC1	ATP5PB
	CLIC1	GLRX	CCT8
	RTN4	YWHAB	KDELR1
	CFLAR	CFLAR	SF3B1
	ZFP36	PSMA2	PCBP1
	ATP5MC2	ZFP36	STUB1
	PSMA2	DDX3X	FNDC3B
	PTP4A2	ATP5MC2	RAC2
	DDX3X	FBL	CIRBP
	YWHAQ	YWHAQ	ISG20
	FBL	PTP4A2	IGLL3P
	STARD7	CTSS	EMC7
	HNRNPU	STARD7	ANAPC13
	EIF2AK3	HNRNPU	DUT
	CTSS	EIF2AK3	NPC2
	CCT8	EMC7	FTH1
	NPC2	CCT8	ERP44
	CAPZA1	PPA1	NONO
	PPA1	NPC2	DAD1
	EMC7	CAPZA1	C11orf58
	SEC14L1	SEC14L1	DDIT4
	UQCR10	UQCR10	GAS5
	RRBP1	CIAO2A	NSA2
	TAPBP	PFDN5	TUBA1C
	PFDN5	TAPBP	RAP1B
	SNHG6	TRA2B	SRPRB
	CIAO2A	SNHG6	SURF4
	COLCA1	SET	DBI
	CRTAP	RRBP1	CCR2
	TRA2B	CRTAP	YWHAG
	CCR2	GDI2	ADA2
	MAPK1IP1L	RAP1B	CDC42SE2
	RAP1B	ATP5PB	RHEB
	GDI2	MAPK1IP1L	COX7B
	ATP5PB	HAX1	VAPA
	CITED2	GANAB	ATP5MF
	SET	CCR2	CD46
	SYVN1	SYVN1	HEXB
	ERP44	IL2RG	CD47
	HAX1	SNRPE	CNPY2
	GANAB	CITED2	NARS1
	IL2RG	ERP44	MAPK1IP1L
	ATP5MF	IL6ST	RTN4
	VOPP1	COLCA1	PDIA4
	ISG20	ISG20	DDX3X
	SF3B1	VOPP1	HAX1
	ALDOA	NDUFB1	IL6ST
	SARAF	SF3B1	ERGIC3
	SRPRB	ALDOA	TMCO1
	GORASP2	SARAF	RTRAF
	SNRPE	GORASP2	MRPL3
	NDUFB1	ATP5MF	HMGN1
	MEF2C	MEF2C	SELENOH
	EMC4	EMC4	SEC11A
	SEC11A	MGAT2	ANAPC16
	CIRBP	SRPRB	EIF2A
	MGAT2	C11orf58	SNRPE
	IL6ST	CIRBP	HNRNPU
	TMED5	PSME1	ALDOA
	RHEB	SEC11A	ZFP36
	PSME1	AP3S1	PEBP1
	C11orf58	TMED5	EIF3M
	AP3S1	NARS1	SELENOF
	SMDT1	RHEB	TMEM243
	NARS1	NDUFB9	AP3S1
	IRAK1	PEBP1	CTSS
	ATP2A2	TMEM147	HSP90AB1
	OS9	SMDT1	EIF3H
	NDUFB9	IRAK1	NDUFA11
	PEBP1	ATP2A2	EIF2S2
	MAT2B	MAT2B	NDUFB9
	SEC31A	CXXC5	NDUFB1
	TMEM147	OS9	GDI2
	RAB10	MRPL3	GHITM
	VAPA	RAB10	SMDT1
	MRPL3	EIF4B	PRELID1
	EIF2S2	SEC31A	DAZAP2
	EIF4B	DBI	SNRPG
	DBI	VAPA	SEC23B
	PRELID1	PRELID1	ALG5
	CXXC5	MAGT1	GTF3A
	MAGT1	SEC23B	H1-10
	EIF2A	EIF2S2	HYOU1
	SEC23B	EIF2A	AQP3
	SLC44A1	SLC44A1	EMC4
	CLIC4	CLIC4	SEPTIN2
	GHITM	GHITM	NDUFB2
	HDLBP	PPP1CB	VOPP1
	DAZAP2	PNRC1	SERINC1
	TXN	DAZAP2	SLC44A1
	EIF3A	EIF3A	PRDX1
	PSMB4	HDLBP	STARD7
	PNRC1	IRF2BP2	PRKD2
	PPP1CB	TXN	HDLBP
	SEPTIN2	PSMB4	UQCR10
	IRF2BP2	SEPTIN2	TSPAN13
	TSPAN13	CD46	CFLAR
	FOS	COX7B	TRMT5
	COX7B	DAD1	EDF1
	GTF3A	HCLS1	SEC31A
	PDIA4	HIGD2A	RSL24D1
	HCLS1	DNAJC10	MORF4L1
	CDC42SE2	FOS	MAT2B
	CD46	COX5B	TXNL1
	DAD1	PDIA4	GORASP2
	EIF3H	TM9SF3	GNG5
	DNAJC10	EIF3H	GLO1
	COX5B	HLA-DOB	COLCA1
	HIGD2A	CDC42SE2	ALG2
	HLA-DOB	DUT	GPR160
	DUT	GTF3A	COX5B
	ALG5	TRIR	ASAH1
	CNPY2	TSPAN13	EIF3A
	TM9SF3	POLR2L	ATP5F1C
	RTRAF	RTRAF	ZFP36L2
	POLR2L	CNPY2	POLR2L
	CCT4	ALG5	FBL
	ASAH1	CCT4	DNAJC3
	FTH1	SON	DNAJC10
	TRIR	MORF4L1	CBX3
	SON	RSL24D1	HNRNPC
	MORF4L1	ALG2	UFC1
	ALG2	CLINT1	HNRNPR
	NDUFAB1	GLO1	IRF2BP2
	TRMT5	RHOQ	RRBP1
	CLINT1	ASAH1	TM9SF3
	RSL24D1	NDUFAB1	NDUFB5
	SRP72	TRMT5	EIF4B
	GNG5	HNRNPR	CITED2
	HNRNPR	SERINC1	HSD17B12
	GLO1	ANAPC16	PNRC1
	ATP5F1C	FTH1	PIM2
	RHOQ	SRP72	OCIAD1
	ANAPC16	GNG5	CDKN1B
	ARPC5L	SLC1A4	SON
	SERINC1	ARPC5L	CLINT1
	SLC1A4	ATP5F1C	NUCB2
	HEXB	CBX3	SNU13
	TGOLN2	TGOLN2	COX8A
	CBX3	EIF3M	SRP72
	HSD17B12	HEXB	PRKAR1A
	NOP10	NOP10	NOP10
	TXNL1	TXNL1	LAMP1
	EIF3M	HSD17B12	COX3
	STAT1	YWHAE	HSPA13
	HMGN3	HMGN3	CRTAP
	NDUFA11	STAT1	HMGN3
	CARS1	UFC1	TMEM167A
	PRKCSH	CARS1	TOMM20
	UFC1	PRKCSH	EVI2A
	YWHAE	NDUFA11	TMEM123
	COX8A	EIF3D	SH3BGRL
	ICAM2	HNRNPC	CCNC
	HNRNPC	ZFP36L2	REXO2
	ZFP36L2	COX8A	CCT4
	SELENOF	ZFAND6	ARPC5L
	EIF3D	PRKAR1A	LARP1
	PRDX1	SELENOF	RBM39
	POMP	ICAM2	RAB10
	PRKAR1A	TMCO1	ATP5ME
	NSA2	GPR160	TCEA1
	ZFAND6	TUFM	MESD
	OGT	SH3BGRL	DARS1
	UCP2	SEC22B	CXXC5
	TUFM	UCP2	HNRNPD
	TMCO1	PRDX1	PSME1
	SH3BGRL	NSA2	TMEM147
	TMEM243	OCIAD1	EIF3D
	OCIAD1	TMEM243	STAT1
	SEC22B	HLA-J	OGT
	GPR160	POMP	PGAM1
	DYNLRB1	TAF10	TGOLN2
	TAF10	OGT	RHOB
	VCP	VCP	USO1
	HLA-J	CDKN1B	SLC1A4
	CDKN1B	TUBB	ARL6IP5
	SNU13	DYNLRB1	SRP19
	LAMP1	SNU13	SFT2D1
	TUBB	LARP1	PSAT1
	PGAM1	AQP3	SEC14L1
	AQP3	BCLAF1	TSPYL1
	LARP1	VDAC2	ERGIC2
	ADAR	DNAJA1	CARS1
	GAS6	PGAM1	TMX1
	NIPA2	ADAR	DSTN
	DNAJA1	NIPA2	CYTIP
	BCLAF1	SEC61A1	MDH2
	VDAC2	CYTIP	EID1
	SEC61A1	GAS6	PRDX5
	CYTIP	EVI2A	VDAC2
	HMGN4	PSAT1	EIF5
	REXO2	LAMP1	NIPA2
	RBM39	HMGN4	SERBP1
	EVI2A	RBM39	C12orf57
	ZNF275	REXO2	NDUFC1
	PSAT1	SDF4	NR3C1
	CCNC	ZNF275	KARS1
	SDF4	OIP5-AS1	CPNE5
	OIP5-AS1	CCNC	YPEL5
	EIF2AK1	NR3C1	PSMC2
	MESD	MSN	HIGD2A
	SNRPG	MESD	BCLAF1
	TMEM123	TAF7	GUSB
	MSN	EIF2AK1	SURF1
	TXNDC11	SNRPG	POMP
	NR3C1	SPTBN1	UXT
	TAF7	EID1	ZFAND6
	CHST15	CHST15	FKBP2
	USO1	TMEM123	NCOA4
	YPEL5	TXNDC11	SRSF2
	GARS1	GARS1	TAF10
	SELENOH	USO1	RHOQ
	EID1	PELI1	HLA-DOB
	SPTBN1	SELENOH	TAPBP
	RAB8A	SERBP1	HMGN4
	ZRANB2	KANK1	ZRANB2
	SERBP1	ATP8B2	OIP5-AS1
	VDAC3	YPEL5	DNAJA1
	ERGIC2	ERGIC2	LMBRD1
	PSMC2	ZRANB2	TXNL4A
	PELI1	VDAC3	TIFA
	TMED9	CAPNS1	VDAC3
	GUSB	PFN1	YIPF5
	KANK1	RAB8A	CAP1
	CAPNS1	TOMM20	ICAM2
	PFN1	PSMC2	PAIP2
	HSPA13	HSPA13	TAF7
	HNRNPD	TBL1XR1	MDFIC
	TBL1XR1	GUSB	CALR
	TOMM20	TMED9	FUNDC2
	IER2	HNRNPD	TPM3
	ATP8B2	IER2	YY1
	TTC3	UXT	FOS
	TIMM8B	TTC3	MDH1
	EIF4H	ADAM10	PSMB3
	LMBRD1	LMBRD1	BMP6
	ADAM10	TIMM8B	ANXA5
	PIM2	DANCR	GARS1
	NDUFB2	EIF4H	LY96
	UXT	ARL6IP5	NOL7
	EDF1	TMX1	SSBP1
	SRSF2	PTBP1	MKNK2
	HNRNPH1	NDUFB2	ADAM10
	DANCR	SEPTIN7	RAN
	ARL6IP5	GPRC5D	IER3IP1
	SEPTIN7	CAPRIN1	COX6B1
	PTBP1	SRSF2	TMED9
	SRP19	TMEM167A	TMSB4X
	TPM3	EDF1	PELI1
	ANXA5	PRDX5	TOP1
	NCOA4	SRP19	NDUFA13
	CAPRIN1	PIM2	KTN1
	TMX1	TPM3	SEPTIN7
	TMEM167A	AASDHPPT	SEC61A1
	DNAJC3	ANXA5	GANAB
	DSTN	DSTN	TUFM
	NDUFB5	TIFA	TXNDC11
	AASDHPPT	HNRNPH1	MBD2
	PRDX5	UBE2E3	FAM214A
	TCEA1	NDUFB5	NDUFB11
	SURF1	TCEA1	UBL5
	TIFA	PLP2	BUB3
	KCMF1	KCMF1	FNDC3A
	RAC1	DNAJC3	NDUFB6
	GPRC5D	SURF1	CCNG1
	WAS	BUD23	PCMTD1
	ARCN1	RAC1	HCLS1
	TMEM50A	NCOA4	RAC1
	PLP2	ARCN1	DANCR
	UBE2E3	TMEM50A	H2AC6
	TFG	WAS	UGP2
	BUD23	PAIP2	NME1
	LY96	HNRNPAB	TMEM50A
	PAIP2	TSPYL1	ZFAND5
	TSPYL1	LY96	SAT1
	ARHGDIB	UBQLN1	SF3B6
	STAU1	ARHGDIB	NACA4P
	UBQLN1	TFG	OPHN1
	SEC63	SEC63	NDUFA3
	HNRNPAB	BMP6	PRCP
	NUCB2	SFT2D1	NDUFS5
	SFT2D1	KARS1	CNIH1
	KARS1	STAU1	CAPRIN1
	BMP6	NUCB2	EIF1AX
	VPS51	C12orf57	ATXN10
	MRPL51	VPS51	UCP2
	YIPF5	H2AC6	SDF4
	C12orf57	CNIH1	TBL1XR1
	H2AC6	MRPL51	PRDX2
	MDH2	MDH2	VCP
	CALR	YIPF5	UBE2E3
	OPHN1	NDUFA12	DYNLRB1
	CNIH1	MEI1	UBQLN1
	NDUFA12	SF3B6	PSMB9
	GLG1	CALR	PLP2
	MEI1	NDUFC1	SEC63
	RAPGEF2	NME1	ATG3
	TOP1	YY1	PHPT1
	SF3B6	CCNG1	SLC39A8
	FNDC3A	GLG1	TRIR
	NME1	KTN1	HLA-J
	YY1	RAPGEF2	GPBP1
	NDUFC1	ARPP19	CHST15
	CCNG1	ATG3	SPTBN1
	KTN1	FAM214A	TCF4
	MAGED1	FNDC3A	PCNP
	PHPT1	TPI1	CHASERR
	FAM214A	ATP6AP1	PTBP1
	ARPP19	PHPT1	EIF4H
	ATG3	TOP1	MSN
	TPI1	MAGED1	ST13
	ATXN10	PIGP	ADAR
	ATP6V0C	ATP6V0C	KLF6
	MAN1A2	FUNDC2	AIDA
	PIGP	SSBP1	COPB2
	ZFAND5	ATXN10	NDUFA12
	ATP6AP1	QARS1	RAPGEF2
	ATP5ME	ZFAND5	GYG1
	PAPOLA	GABARAPL2	TIMM8B
	MDH1	PAPOLA	GABARAPL2
	SSBP1	MDH1	ANXA2
	QARS1	OPHN1	MTHFD2
	FUNDC2	BUB3	TOMM5
	AARS1	AARS1	C19orf53
	GABARAPL2	MAN1A2	TMEM14C
	ST13	C19orf53	LAP3
	KLF6	RBMX	MRPL51
	BUB3	TNFAIP8	AASDHPPT
	TNFAIP8	IDH2	TTC3
	RBMX	EIF1AX	IER2
	C19orf53	ST13	RBIS
	FKBP2	STRAP	DDX21
	IDH2	ATP5ME	MAGED1
	STRAP	KLF6	ELOB
	EIF1AX	ARPC5	SCARB2
	CDK5RAP3	ARHGEF2	BUD23
	ARPC5	NDFIP1	HSPA9
	SCARB2	FKBP2	SYVN1
	LRRC59	MTHFD2	MBNL1
	MTHFD2	CDK5RAP3	ARHGDIB
	IER3IP1	IER3IP1	NDUFB8
	ARHGEF2	HSPA9	IGKV1-17
	NDFIP1	SCARB2	PET100
	PCNP	PCNP	EIF2AK1
	RAB6A	GPBP1	KCMF1
	PSMB3	PSMB3	C6orf62
	HSPA9	LRRC59	PIGP
	GPBP1	RAB6A	ZNF275
	MTCH1	CBX4	IFI16
	COPB2	MTCH1	AK3
	CBX4	PSMB9	MARCKS
	EIF5	TXNL4A	PSMB2
	PSMB9	AK3	PSMD6
	TXNL4A	PET100	LGALS1
	PET100	PSMA3	CHP1
	AK3	RAN	PSMA3
	R3HDM4	COPB2	ITGA4
	SELENOW	FAM174A	LMO4
	RAN	CCT3	PSMG2
	PRCP	TMEM205	TNFAIP8
	PSMA3	SELENOW	NANS
	MDFIC	UGP2	ATP2A2
	FAM174A	EIF5	RAB6A
	UGP2	MDFIC	OS9
	ZNF207	R3HDM4	CNOT7
	TMEM205	ZNF207	BLOC1S6
	PSMG2	POLR2J	LTA4H
	CCT3	SYNGR2	KANK1
	PCMTD1	LRP10	SRSF9
	PSMD6	PSMG2	COMMD6
	MKNK2	ENSA	TUBB
	MBNL1	USP14	LAX1
	ANAPC5	PSMD6	MAP3K1
	LRP10	NAA50	ARPP19
	POLR2J	TCF4	STAU1
	USP14	ANAPC5	SRSF5
	ATP6V1A	PRCP	GPX1
	ENSA	MBNL1	ENSA
	GYG1	PCMTD1	STRAP
	NDUFB6	NDUFB6	PPP2CA
	MBD2	MKNK2	PAPOLA
	SYNGR2	MBD2	STT3A
	TCF4	EZR	IFNAR2
	CPEB4	KPNB1	UBE2D2
	IGKV1-17	CPEB4	ANAPC5
	TCP1	H1-2	HNRNPAB
	CHP1	TCP1	NFE2L2
	H1-2	GYG1	ARPC3
	TOMM5	CHP1	QPCT
	KPNB1	PPM1K	ADI1
	PPM1K	ATP6V1A	GPX4
	NFKBIA	SLC39A8	RBMX
	NAA50	DDX21	ATP8B2
	SAT1	NFKBIA	KPNB1
	DDX21	TOMM5	DPM1
	EIF3I	PPP2CA	IGKV1OR2-108
	EZR	ITGA4	GLG1
	STK24	NDUFA3	PPT1
	NDUFS5	EIF3I	CSNK1A1
	SRSF5	MMGT1	UBXN4
	NDUFA3	STK24	ATP5F1D
	SLC39A8	NDUFS5	MAN1A2
	PPP2CA	NDUFA13	EBLN3P
	WAC	WAC	SF3B5
	MMGT1	UBA1	MTCH1
	NDUFA13	ALG8	GAS6
	TNS3	TNS3	POLR2J
	UBA1	DUSP22	HNRNPDL
	TRAM2	SRSF5	FAM174A
	ALG8	BHLHE41	CAPZA2
	DUSP22	AIDA	LSM5
	LAP3	MARS1	LRP10
	AIDA	TES	UQCRC2
	MARS1	ANXA2	H1-2
	PSMB2	MLEC	QARS1
	ITGA4	LGALS1	KLHL6
	MLEC	MAP3K1	CBX4
	GNA13	TRAM2	CEBPB
	BHLHE41	GNA13	EIF1B
	ANXA2	LAP3	EBAG9
	LGALS1	PSMB2	TMEM205
	MAP3K1	SAT1	STK24
	TES	SLC35B1	LAMP2
	BLOC1S6	BLOC1S6	NDUFA2
	FOLR1	YTHDC1	SDHD
	SLC35B1	CERS2	USP14
	PPT1	PPT1	COX7A2L
	YTHDC1	LTA4H	ORMDL1
	LTA4H	FOLR1	EPOR
	CERS2	KHDRBS1	WAC
	PHF1	NDUFB11	IGLV2-14
	SNRPB2	SNRPB2	NHP2
	NDUFB11	CADPS2	UBE2G1
	NOL7	PARP1	NFKBIA
	KHDRBS1	NOL7	DUSP22
	IFNAR2	IFI16	TNPO1
	IFI16	IGKV1-17	KHDRBS1
	CADPS2	KLHL6	GNA13
	PRDX2	PHF1	CCT3
	XRCC6	XRCC6	IDH2
	NDUFB8	PRDX2	LYPLA1
	KLHL6	PRMT1	PPP1R2
	PPP1R11	ORMDL1	XPOT
	EIF2S3	AMZ2	VPS51
	IGLV2-14	PPP1R11	RAD23B
	YME1L1	GNB1	SPTLC1
	PARP1	MGST3	SRSF7
	PRMT1	EIF2S3	EIF2S3
	AMZ2	UQCRC2	AARS1
	GNB1	IFNAR2	RAB8A
	ORMDL1	YME1L1	SAR1B
	UQCRC2	LYPLA1	SDF2L1
	SRSF7	UHMK1	PSMB7
	LYPLA1	NDUFB8	SEC24A
	CHASERR	SRSF7	TCP1
	UHMK1	COPS2	EPRS1
	NANS	CHASERR	ZNF207
	COX6B1	COX6B1	MMGT1
	CTBP1	SHC1	CPEB4
	SHC1	CCT2	BHLHE41
	CSNK2B	HNRNPM	SHC1
	MGST3	HIPK3	TPI1
	GRN	NANS	YME1L1
	CCT2	CSNK2B	AMZ2
	FCRL5	SCYL2	NAA50
	SRSF9	TMX2	ATP6V1A
	COPS2	SRSF9	METTL9
	HNRNPM	CTBP1	EMB
	SNHG1	SNHG1	GADD45A
	TMX2	ATP5F1D	DHX15
	COX7A2L	XPOT	LRRC59
	HIPK3	COX7A2L	FBXW7
	ATP5F1D	PPP1R2	ZMPSTE24
	BHLHA15	BHLHA15	CSTB
	COX7A2P2	FCRL5	TNS3
	UBL5	GRN	METTL5
	AP3D1	RER1	CLTA
	HNRNPDL	COX7A2P2	CCT2
	CEBPB	EBLN3P	PPP1CB
	PPP1R2	SRSF11	MFSD1
	SCYL2	HNRNPDL	NOP58
	XPOT	UBE2D2	ARL5A
	RER1	AP3D1	PRMT1
	ADI1	ADI1	SAP18
	EBLN3P	CEBPB	SNHG32
	SRSF11	DOCK8	NDUFA5
	MARCKS	TNPO1	HINT2
	TNPO1	UBL5	UHMK1
	DOCK8	METTL9	CDK5RAP3
	UBE2D2	ARID1A	TES
	STT3A	SUMO3	TFG
	TMSB4X	NPTN	UFM1
	GPX1	ANP32A	PAM
	CSNK1A1	PRRC2C	SP3
	PRRC2C	MARCKS	MRPL20
	NPTN	RNF11	NDUFV2
	METTL9	IMPDH2	ELAVL1
	RBBP7	STT3A	PSMA4
	RNF11	MAP2K2	ATP6AP1
	SUMO3	CSNK1A1	YTHDF2
	MAP2K2	CLTA	SRSF1
	ANP32A	EMP3	AP3D1
	ARID1A	RBBP7	RPL22L1
	DARS1	KRT10	ERGIC1
	SEC24A	KLF13	RNF11
	CLTA	IPO7	NPTN
	IMPDH2	ELAVL1	ARMCX3
	KRT10	ARHGDIA	RBBP7
	CALU	RBIS	METTL23
	PNRC2	ATP5IF1	BHLHA15
	ELAVL1	IGLV2-14	TRAM2
	ATP5IF1	SEC24A	MYC
	IPO7	COPZ1	EIF3J
	EMP3	SPTLC1	HIGD1A
	EWSR1	YTHDF2	EIF3G
	RBIS	PNRC2	CMPK1
	GRB2	NFE2L2	RER1
	YTHDF2	GPX1	ARPC5
	FAXDC2	CALU	TAX1BP1
	NFE2L2	EMB	XRCC6
	PPP6C	NHP2	YTHDC1
	KLF13	FAXDC2	GTF3C6
	CAP1	EIF3J	NDFIP1
	COPZ1	EWSR1	RGS2
	SPTLC1	GRB2	HIPK3
	EMB	DARS1	CAV1
	ARHGDIA	PPP6C	MGST3
	GPX4	CAP1	ALG8
	EIF3J	TSTD1	COX17
	NHP2	ADPGK	MEI1
	ADPGK	ARPC3	ARFGAP3
	ARPC3	SNHG32	MRPS21
	SNHG32	ATP6V0B	TMEM14B
	RPL7L1	TMEM14C	MARS1
	TMEM14C	SELENOM	COPS2
	ANXA6	CTDSP2	MCFD2
	ATP6V0B	SP3	IMPDH2
	SP3	GPX4	PJA2
	IGKV1OR2-108	XRCC5	FCRL5
	DPM1	AZIN1	EZR
	SELENOM	DPM1	NGLY1
	TSTD1	GDI1	RPL7L1
	XRCC5	ZMPSTE24	PPP6C
	GDI1	RPL7L1	ATP6V0B
	CSTB	CSTB	KRT10
	ZMPSTE24	ANXA6	SLC38A1
	CTDSP2	CELF2	RCN2
	EGR1	CNOT7	XRCC5
	EIF1B	FYTTD1	INPP4A
	CNOT7	EBAG9	TSTD1
	AZIN1	VMA21	ARCN1
	ALKBH5	HINT2	JAK1
	HINT2	EIF1B	SELENOM
	CELF2	C1QBP	OTUD1
	B4GALT3	ALKBH5	SEC22B
	VMA21	B4GALT3	COPS9
	IFITM2	IFITM2	SCYL2
	NDUFA2	EGR1	PPM1K
	FYTTD1	ANP32E	MLEC
	NACA4P	PJA2	SECISBP2
	EBAG9	ERN1	WIPI1
	PJA2	TMSB4X	MYL12B
	UBE2L6	NDUFA2	DIPK1A
	CAV1	CAV1	BLNK
	ANP32E	ARFGAP3	MRPS15
	ARFGAP3	UBE2L6	PRDX3
	MRPS15	MRPS15	NAXE
	MFSD1	XIAP	SRSF11
	ERN1	NACA4P	DOCK8
	C1QBP	MFSD1	ARHGEF2
	HIGD1A	ADIPOR1	SNHG1
	COMMD6	HIGD1A	CELF2
	SRP68	VDAC1	HNRNPM
	TMED4	COMMD6	ANP32E
	ADIPOR1	COPA	POLR2B
	EIF3G	SRP68	GPRC5D
	ARL5A	ATP2A3	TMX2
	ATP2A3	NFE2L1	C1QBP
	XIAP	ARL5A	MALSU1
	COPA	EIF3G	SNRPB2
	SAR1B	SND1	SLC35B1
	RTN3	SAR1B	FYTTD1
	NFE2L1	ABHD3	PARP1
	SND1	FKBP5	EIF3I
	METTL5	RTN3	NDUFA6
	LAPTM5	IDS	MANEA
	USP7	METTL5	GNG7
	USP16	USP16	DHRS7
	VDAC1	DHRS7	CERS2
	GADD45A	USP7	FCGR2B
	NGLY1	TMED4	H2AZ2
	ABHD3	LSM5	CALU
	IDS	EPRS1	ACAT1
	LSM5	CHCHD10	GOLGA8N
	SEC13	LAPTM5	HBB
	EPRS1	INPP4A	SEC13
	CHCHD10	NGLY1	QKI
	MAPKAPK2	NDUFA5	VMA21
	ENO1	ENO1	RBBP4
	INPP4A	SEC13	CREG1
	FKBP5	UBE2G1	TIMM17A
	MYC	OLA1	XPO1
	FRZB	GADD45A	RAB5A
	RABGGTB	MYC	RABGGTB
	GTF3C6	SF3B5	UBE2L3
	ACAT1	RABGGTB	CTBP1
	OLA1	MAPKAPK2	SEPTIN9
	UBE2G1	ACAT1	VBP1
	DHRS7	JAK1	COPZ1
	SF3B5	VBP1	MRPL33
	NDUFA5	GTF3C6	RTN3
	LAX1	PAICS	PNRC2
	VBP1	COPE	RAD21
	LINC00520	RCN2	SNHG29
	OR7E104P	IGKV1OR2-108	SYNGR2
	TPP1	CAPZA2	RNF13
	SEPTIN9	LMO4	AZIN1
	PAICS	BLNK	SUMO3
	PAM	SARS1	TMEM126A
	BLNK	PAM	OLA1
	DIPK1A	XPO1	CADPS2
	JAK1	CMTM6	GRB2
	CMTM6	SEPTIN9	PPP1R11
	CAPZA2	TPP1	G3BP2
	SARS1	LAX1	IL2RG
	XPO1	FAM162A	AFTPH
	NOP58	MRPL33	CSNK2B
	LMO4	FRZB	GSTP1
	SDHD	SDHD	PRKCSH
	MRPL33	NOP58	CGGBP1
	MACROH2A1	OR7E104P	KLF13
	QPCT	DIPK1A	PAPSS1
	FAM162A	MARCHF6	TMEM208
	RAB5A	UBE2N	SMIM26
	RCN2	ILF2	NMRK1
	SLC7A1	G3BP2	OXR1
	ELOB	SLC38A1	PSMB6
	UBE2N	TMEM245	XIAP
	COPE	MACROH2A1	ATP6V0C
	SERINC3	RAB5A	ACADM
	MARCHF6	SERINC3	ANP32A
	G3BP2	ELOB	EMC3
	CGGBP1	SLC7A1	FKBP5
	UBXN4	LINC00520	YWHAE
	MAN2B1	TMEM14B	GSTO1
	AFTPH	CGGBP1	MACROH2A1
	SLC38A10	AFTPH	GLT8D1
	SDF2L1	SLC38A10	SLC39A6
	TMEM245	CNDP2	ERN1
	SECISBP2	QPCT	TMEM19
	SQSTM1	UBXN4	UBE2B
	ILF2	PRDX3	IFITM2
	SLC38A1	SQSTM1	PDCD10
	PRDX3	ZFAS1	ADIPOR1
	RAD23A	SDF2L1	VDAC1
	ZFAS1	UBE4A	PHF1
	PSMB7	METTL23	C21orf91
	CNDP2	GSTP1	SPAG4
	TMEM14B	FCRLA	ACBD3
	WIPI1	SECISBP2	LMAN2
	METTL23	PSMB7	CWC15
	NDUFV2	NUCKS1	BST2
	UBE4A	WIPI1	PFN1
	UBE2L3	FAM89B	FAM162A
	GSTP1	RAD23A	SELENOW
	TECR	CSK	COPA
	USP32P2	NDUFV2	ATP2A3
	FAM89B	USP32P2	RWDD1
	ACADM	ACADM	IDS
	FCRLA	KIAA1191	ITM2A
	GNG7	UBE2L3	CLNS1A
	NUCKS1	EFR3A	VPS29
	UFM1	MAN2B1	SARS1
	PSMA4	EMC3	PIP5K1B
	CREG1	PSMA4	CMTM6
	EMC3	GNG7	LIPA
	PUM2	TECR	ZFAS1
	EFR3A	QKI	ALDH9A1
	KIAA1191	ACTR2	ANAPC11
	COPS9	MAPRE1	PDHB
	ATP6V1F	PSMB6	HP1BP3
	CSK	GPI	MBNL2
	RNPS1	ATP6V1F	TMEM50B
	PSMB6	UFM1	KIAA1191
	MAPRE1	C21orf91	SMIM15
	QKI	FCGR2B	MYCBP2
	ACTR2	RNPS1	SND1
	TMEM126A	COPS9	PRRC2C
	GOLGA8N	PUM2	MAN2B1
	MANEA	TMEM126A	ALKBH5
	TMEM208	KRAS	UBE2N
	RPL22L1	CREG1	B4GALT3
	GPI	TMEM208	GYPC
	C21orf91	THAP12	RAB2A
	C6orf62	ITFG1	TMED4
	GYPC	GYPC	SELENOP
	THAP12	MANEA	SLIRP
	ITFG1	RAD21	THAP12
	SPAG4	RAB2A	ENTPD4
	ATP1B3	NAXE	UBE2L6
	FCGR2B	GOLGA8N	TMEM70
	KRAS	RPL22L1	GNB1
	OTUD1	COX17	TECR
	COX17	OTUD1	WAS
	NAXE	CARMIL1	RNF181
	CHST12	C6orf62	FBXL5
	UBE2H	CCNDBP1	ANXA7
	IFNGR2	RAB3GAP1	RASA1
	RAB2A	CHST12	WDR83OS
	PAPSS1	PIP5K1B	SCP2
	RAD21	PTDSS1	CCNDBP1
	PIP5K1B	SPAG4	NEDD8
	RAB3GAP1	PAPSS1	GTF2A2
	SLC12A6	ATP1B3	IPO7
	CCNDBP1	TMEM19	C4orf3
	PDIA5	IFNGR2	PDIA5
	DHX15	DHX15	USP16
	PTDSS1	UBE2H	SRSF6
	TMEM19	SLC12A6	VKORC1
	RGS2	SULF2	ETFA
	LASP1	PDIA5	PTTG1IP
	SULF2	SH3KBP1	COX7A2P2
	SH3KBP1	C11orf24	FNTA
	C11orf24	TINF2	ELK3
	CARMIL1	SRSF6	MICOS10
	TINF2	PDCD10	MICOS13
	FBXW7	PDHB	ACTR2
	PDHB	RAD23B	SLC39A14
	SRSF6	TMEM50B	PUM2
	PDCD10	ARMCX3	NDUFB10
	LAMP2	LASP1	ADD3
	WTAP	RASA1	COX16
	ARMCX3	STAG2	MAPRE1
	CWC15	FBXW7	HMGB2
	LINC01210	ANXA7	PAICS
	ANXA7	LAMP2	ILF2
	PLCG2	RETREG3	ATP6AP2
	RAD23B	CWC15	SH3GLB1
	MAX	RASSF5	EWSR1
	ARMCX6	WTAP	ITFG1
	RBBP4	RBBP4	GNL3
	TMEM50B	PM20D2	PSMD14
	STAG2	RSRC2	PDE4B
	RETREG3	SNHG29	GRN
	RASSF5	ACBD3	NGRN
	GSTO1	ARMCX6	SLC7A1
	SNHG29	BAG6	ADPGK
	RASA1	NDUFA6	POP5
	BAG6	EDEM3	CUL3
	SNHG16	UFL1	MRPL36
	RSRC2	SNHG16	KLHDC2
	ACBD3	AIMP1	EPS15
	DCTN3	IL16	PPP1R15B
	IL16	DCTN3	AKR1A1
	MRPL20	MRPL20	FCRLA
	AIMP1	PLCG2	TUBA4A
	EPS15	MAX	SH3KBP1
	BET1	RGS2	PSMA7
	CD44	LUC7L3	CLDND1
	NDUFA6	MCFD2	ABHD3
	TOMM70	EPS15	REPIN1
	MXI1	UGCG	ORAI2
	UFL1	MXI1	RBX1
	LUC7L3	BET1	SRSF8
	IFNGR1	ASXL2	ARL8B
	UGCG	G3BP1	UBE4A
	ORAI2	LINC01210	CHCHD10
	PM20D2	TOMM70	TXNDC12
	SDHAP1	NMRK1	RBM3
	CNOT6L	NDUFS2	LAMTOR5
	G3BP1	GSTO1	H2BC5
	MCFD2	NGRN	LAPTM5
	EFCAB14	SDHAP1	TOP2B
	EDEM3	GTF2A2	UGCG
	NDUFS2	IFNGR1	DERL2
	GTF2A2	NCOA7	RBM47
	NCOA7	REPIN1	CAPNS1
	NMRK1	NPIPA1	PHC3
	NPIPA1	VKORC1	TMEM106B
	REPIN1	MALSU1	MBD4
	NMD3	CNOT6L	RYBP
	H2AZ2	ISOC1	CCPG1
	MALSU1	EFCAB14	BET1
	VKORC1	BANF1	PRDX6
	PUM1	CD44	SNX5
	NGRN	H2AZ2	STAG2
	BANF1	NMD3	FRZB
	DDX24	SCAMP2	AURKAIP1
	ASXL2	ORAI2	WTAP
	CMPK1	PUM1	PLAC8
	MYL12B	BRK1	ATP1B3
	SPATA24	CLNS1A	MARCHF6
	SCAMP2	DDX24	OGFOD3
	TUBA4A	NDUFB10	G3BP1
	ISOC1	MYL12B	CDIPT
	POP5	POP5	PLCG2
	BRK1	CMPK1	NDUFS3
	TAX1BP1	NEDD8	SRP68
	CLNS1A	OGFOD3	ZNF146
	OGFOD3	RRP1B	TMEM126B
	LIPA	TRIM28	ATP5IF1
	RNF181	WDR83OS	ELOC
	NDUFB10	VPS29	EDEM3
	GNL3	APEX1	COA3
	CAT	SLC39A14	DDX6
	TERF2IP	SPATA24	RSRP1
	RNF13	TUG1	MAT2A
	TUG1	TAX1BP1	SNRPB
	AKR1A1	TERF2IP	PTDSS1
	RRP1B	TIMM17A	NDUFS6
	SRSF1	RNF181	NMD3
	SLC39A14	HACD3	BRK1
	NEDD8	TUBA4A	RSRC2
	TRIM28	GNL3	APEX1
	ADD3	OXR1	C1GALT1C1
	VPS29	TMEM70	KRAS
	SNX5	CAT	WDR82
	TMEM70	ADD3	NDUFB3
	WDR83OS	SRSF1	SEM1
	TIMM17A	RNF13	NFE2L1
	APEX1	AKR1A1	TARS1
	TXNDC12	SNX5	UBE3A
	FAM98A	IRF9	NCOA7
	GALNT2	TXNDC12	UFL1
	HACD3	PLAC8	SHMT2
	IRF9	WDR82	ARMCX6
	SMIM15	GALNT2	SLC12A6
	HMGB2	PPP1R15B	PRNP
	ZMYND11	SMIM15	ZC3H15
	MIR29B2CHG	NDUFS3	ITGAE
	NDUFS3	MIR29B2CHG	DNAJC15
	ATP6AP2	ATP6AP2	IFNGR1
	OXR1	SPG21	UBA2
	PPP1R15B	FAM98A	CAT
	ALDH9A1	ALDH9A1	DCTN3
	SPG21	SH3GLB1	ORMDL2
	PRDX6	ZMYND11	PRKACB
	PLAC8	HP1BP3	SRI
	WDR82	KPNA2	LUC7L3
	CSF2RB	PHC3	ANKRD28
	KPNA2	ERGIC1	ELOVL5
	SAP18	SH2B2	AMPD1
	PRKACB	TTC17	SQSTM1
	SLC39A6	GLT8D1	UNC50
	HP1BP3	SLC39A6	R3HDM4
	GLT8D1	CPNE3	ENO1
	PHC3	HMGB2	BZW1
	SRSF8	TOP2B	FAM98A
	STK4	PRKACB	LITAF
	TTC17	VPS13C	GLB1
	SH2B2	PRDX6	CNOT6L
	MICOS10	LIPA	PUM1
	MLX	SRSF8	PRRC1
	SMIM26	TLNRD1	TMEM245
	SH3GLB1	MICOS10	FDX1
	ERGIC1	MLX	MRPL32
	VPS13C	SMIM26	REX1BD
	ANKRD28	ANKRD28	TLK1
	TOP2B	CSF2RB	ASNS
	PSMD10	PSMD10	GUK1
	UBE2I	TMEM126B	UBE2QL1
	ZNF146	MGAT1	SNHG8
	MGAT1	SAP18	TMEM248
	TMEM126B	UBE2I	MYL12A
	LMAN2	ZNF146	MFF
	RELA	CCPG1	PRPF40A
	CPNE3	RELA	MXI1
	H2BC5	LMAN2	RBMS1
	GLS	GLS	AIMP1
	UBE2B	STK4	SSU72
	CNOT1	UBE2B	USP7
	JUNB	TARS1	CNDP2
	RBM47	RBM47	TSPAN31
	REX1BD	ITM2A	CTSB
	RANBP9	H2BC5	PTPN11
	TMEM106B	SNRPB	RASA2
	SCP2	TMEM106B	BRD2
	PSMD14	CNOT1	UBE2H
	SELENOP	PRRC1	GOLT1B
	COA3	ETFA	C15orf61
	CHID1	PCYOX1	ANXA6
	MBNL2	RANBP9	SDHAP1
	CCPG1	JUNB	ERBIN
	TLNRD1	COA3	WIPF1
	SNRPB	ORMDL2	PPP2CB
	PRRC1	SCP2	RANBP9
	TARS1	CHID1	TPP1
	BCAP31	PLOD3	TMED7
	SRP54	REX1BD	C11orf24
	ETFA	BCAP31	IFNGR2
	PLOD3	SRP54	SPG21
	PCYOX1	PSMD14	SERINC3
	MAT2A	MBNL2	VAMP7
	SEM1	MAT2A	ATL3
	CLDND1	CLDND1	PSMD10
	SRM	SHMT2	MAPKAPK2
	ITM2A	SEC16A	MAP2K2
	SEC16A	C4orf3	RAB3GAP1
	SHMT2	EIF3B	CTR9
	EIF3B	ELOVL5	PRKD3
	ORMDL2	SEM1	ZMYND11
	WARS1	ARL8B	TERF2IP
	MRPL36	WARS1	PERP
	BST2	SRM	TOR3A
	ELOVL5	RYBP	CHST12
	POLR2B	PTPN6	HACD3
	ARL8B	POLR2B	PURA
	OSBPL9	ATL3	SRP54
	MYCBP2	MRPL36	STAT2
	ITGB1	MRPL32	ZFR
	PTPN6	FBXL5	ETF1
	CUL3	ELK3	SVIP
	MRPL32	BSG	CTDSP2
	GUK1	OSBPL9	USP32P2
	RYBP	LITAF	NDUFV1
	ATL3	GUK1	WDR61
	ETF1	CUL3	HSPB11
	FBXL5	ETF1	PCYOX1
	DKC1	CAST	THOC7
	ELK3	DKC1	RAB11A
	C4orf3	BST2	ARFGEF2
	GLB1	CTR9	VPS13C
	AMPD1	CDC42	CFAP97
	LITAF	GLB1	DDX24
	HBB	FNTA	TMEM263
	PDE4B	PDCD6IP	CPNE3
	FNTA	MFF	HDDC2
	NDUFB3	RBM3	ATP6V1F
	BSG	MYCBP2	EFR3A
	CLCN3	NDUFB3	NOLC1
	MFF	CLCN3	PPHLN1
	PDCD6IP	FTSJ1	TTC17
	DENND5B	RRAGD	UBE2Q2
	ENTPD4	ENTPD4	MCTS1
	CAST	ILF3	SNHG16
	CTR9	BPNT2	RRAGD
	BPNT2	DENND5B	TSN
	CACNG6	PDE4B	RNPS1
	MBD4	TSN	CD44
	DDX6	SCAMP5	CHID1
	RWDD1	SELENOP	LAMTOR1
	IGHD	ITGB1	PDCD4
	FTSJ1	NDUFV1	DENND5B
	RRAGD	UBE3A	IL16
	CDC42	MBD4	PPA2
	TSN	TLK1	ITGB1
	NDUFV1	RWDD1	RBPJ
	RBM3	DDX6	EFCAB14
	PRPF40A	SLIRP	ISOC1
	FBXO7	ZNF791	KIF5B
	P2RX5	CACNG6	MED13
	ILF3	C1GALT1C1	RETREG3
	TTC14	PPHLN1	ZCRB1
	C1GALT1C1	PRPF40A	SLC25A36
	UBE3A	TTC14	P2RY8
	SLIRP	FBXO7	CAST
	ZFP91	ZFP91	SPATS2
	NRDC	AMPD1	TTC14
	TLK1	SF1	RDX
	PTTG1IP	RALGPS2	PLXNC1
	ARPC1A	ARPC1A	MAX
	SCAMP5	P2RX5	ENOPH1
	PPHLN1	VAMP7	ZNF791
	ZNF791	NRDC	GALNT2
	KIF5B	PERP	SLC38A10
	VAMP7	CDIPT	PSMC6
	TUBB4B	TCTN3	BOLA3
	TCTN3	SUCLG2	OAT
	CDIPT	KLHDC2	UBE2I
	ACP1	SUCO	HADHB
	TMEM248	TUBB4B	TINF2
	RALGPS2	KIF5B	EIF3B
	GOLT1B	ACP1	TOR1AIP1
	KLHDC2	TMEM248	PITPNB
	FDX1	GOLT1B	NDUFS8
	PRNP	ZDHHC5	AGA
	AURKAIP1	PTTG1IP	BCL2
	TAP1	SRRM1	MRPL9
	DNAJC15	FDX1	AIG1
	SF1	POLE3	CSF2RB
	MRPS21	EIF2S1	MZT2A
	EIF2S1	RPA2	HEBP2
	ZDHHC5	LRPPRC	DYRK1A
	SRRM1	PRNP	TAP1
	SUCO	DNAJC15	SNRPD1
	ARFGEF2	ZC3H15	PSMD4
	FLOT1	TMED7	ZBED5
	TAGAP	SLC25A36	TSG101
	SLC25A36	HDGF	MRPL57
	LY9	ANAPC11	CHMP2A
	RPA2	TAP1	CSK
	OAT	MRPS21	TUBB4B
	RAB11A	LIN7C	FGFR1OP2
	YIF1A	TAGAP	KLF10
	TCF3	YIF1A	TBL2
	ZC3H15	RAB11A	LAMP3
	POLE3	IARS2	FTSJ1
	STAT2	AURKAIP1	TOMM70
	PITPNB	FLOT1	CCNL1
	HDGF	PRKD3	POLR2I
	SH3BP5	PPP2CB	CAB39
	ANAPC11	MED13	VAMP8
	TBL2	UBE2Q1	GM2A
	PPP2CB	ARFGEF2	SUCO
	TMEM214	TMEM165	IGKV4-1
	LRPPRC	TCF3	SRRM1
	MED13	SH3BP5	LIN7C
	MRPL57	EIF4E	FIS1
	SCAMP1	TBL2	DKC1
	ITGAE	LY9	OSBPL9
	ACLY	OAT	SUCLG1
	IARS2	ATRX	HNRNPA0
	TMED7	PITPNB	KPNA2
	UBE2Q1	TM9SF4	CHSY1
	SUCLG2	ACLY	BCAP31
	TSPAN31	UBA2	SRM
	EIF4E	RASA2	SNAP23
	PRKD3	SCAMP1	TALDO1
	LIN7C	TSPAN31	CCDC117
	TMEM165	ITGAE	RRP1B
	ATRX	TMEM214	FAM8A1
	RASA2	MRPL57	FBXO9
	BBLN	BBLN	NUDT4
	TM9SF4	IRF2BPL	RASSF5
	PERP	DYRK1A	LASP1
	GGA1	SYNCRIP	RRAGA
	RRAGA	RRAGA	UBE2Q1
	GM2A	UQCRC1	RAD17
	SSU72	MRPL49	SMIM7
	ST3GAL3	SRI	FXR1
	DYRK1A	ACO2	SCAMP1
	SRI	TARDBP	SUCLG2
	MRPL49	NSF	GLS
	CYSLTR1	STAT2	PDCD6IP
	ERBIN	PIK3C2A	ATF6
	TARDBP	SNHG8	EDEM1
	SNHG8	PLXNC1	FAM13A
	UBA2	IGHD	MRPL47
	PIK3C2A	CYSLTR1	TCTN3
	SYNCRIP	ERBIN	NT5C3A
	CLPTM1	CLPTM1	ISG15
	ACO2	NBN	UBA1
	IRF2BPL	SSU72	UBE2A
	NSF	GM2A	MLX
	NT5C3A	GGA1	SYNCRIP
	LAMTOR5	DDB1	NCOA3
	NBN	TMEM87A	EIF2S1
	UQCRC1	MICOS13	CIAO2B
	SUMO1	ST3GAL3	SMC4
	RSRP1	LAMTOR5	SCOC
	PTPN11	PTPN11	TCF3
	TMEM87A	HBB	NUCKS1
	MICOS13	SNRNP200	MRFAP1L1
	NDUFS6	NT5C3A	LRPPRC
	PLXNC1	ATF6	CELF1
	ME2	CDKN1A	MRPL41
	TIMP1	SUMO1	CTHRC1
	DDB1	NDUFS6	TIMM23
	HECA	POLR2I	CHMP5
	POLR2I	ELOC	TIMP1
	NOLC1	BOLA3	SULF2
	TIMM23	HECA	PCGF5
	SNRNP200	UBE2Q2	VPS26A
	TOR3A	TIMM23	PM20D2
	BOLA3	BCL2	RALGPS2
	UBE2Q2	TMEM179B	C16orf54
	TRAPPC8	UNC50	MRPS33
	UBE2D4	TOR1AIP1	ACP1
	ATF6	CS	TUG1
	CDKN1A	NOLC1	ECHDC1
	GLUL	TOR3A	RNF103
	ELOC	CHSY1	NRDC
	MX1	HDDC2	SAR1A
	MIEF1	MIEF1	SUMO1
	TMEM179B	RSRP1	ARL1
	MYD88	TIMP1	P2RX5
	UNC50	SMIM7	SNX18
	TOR1AIP1	WDR61	FLI1
	HDDC2	TRAPPC8	WARS1
	KLF10	MYD88	ARPC1A
	CHSY1	WIPF1	PTP4A1
	WIPF1	OXA1L	EMP3
	CS	KLF10	ZCCHC7
	CCDC117	MX1	SEC16A
	CRLF3	CFAP97	FAM89B
	BCL2	SNX18	XRN1
	FAM8A1	EIF2AK2	LTN1
	CFAP97	UBE2D4	CERK
	DERL2	RSL1D1	LMBRD2
	HADHB	ME2	TAGAP
	SNX18	EBPL	RO60
	EIF2AK2	HADHB	MRPS31
	ISG15	DERL2	CNIH4
	CTSB	DESI2	YIF1A
	OXA1L	CRLF3	PTPN2
	GFPT1	PRPF8	FGD2
	WDR61	GFPT1	BPNT2
	PDCD4	DEPTOR	CCDC90B
	SNAP23	MRFAP1L1	PPP3CB
	EBPL	SVIP	RSL1D1
	SDCBP	FBXO9	VAMP3
	LPXN	SRRM2	RNF114
	FBXO9	CCDC90B	PRKAR2A
	CCDC90B	MDM4	ANKRD36BP2
	SMIM7	NCOA2	CBFB
	RAP2B	FAM8A1	SH3BP5
	SRRM2	PDLIM1	NDUFS2
	RNF103	CCDC117	PLOD3
	MDM4	PTP4A1	NSF
	PRPF8	TMEM9B	BTG3
	DESI2	MRPL24	DEPTOR
	ZBED5	FGFR1OP2	STK4
	SVIP	RNF103	PIGK
	MRFAP1L1	SNAP23	CLCN3
	ERO1A	ZBED5	CTSO
	PDLIM1	LPXN	RAD23A
	LTN1	LTN1	ME2
	PTP4A1	PDCD4	MIR29B2CHG
	MLH1	ERO1A	IL6R
	CBFB	GLUL	CMBL
	ACADVL	ISG15	EIF4E
	CCNL1	SINHCAF	GSPT1
	RSL1D1	RAP2B	SDCBP
	COX16	CBFB	COPE
	ARL1	FOXN3	STOM
	NCOA2	MLH1	CDKN1A
	MRPL24	ARL1	DDX39A
	FOXN3	KRCC1	ACLY
	SINHCAF	STAT3	POLE3
	FGFR1OP2	AGA	SNRPA1
	KRCC1	SMARCA2	C11orf1
	TMEM9B	COX16	CRLF3
	STAT3	SLC1A5	LRRC47
	BRD2	ASNS	MRPL24
	AGA	RDX	C5orf15
	RDX	SDCBP	MRPL34
	ASNS	YARS1	NCOA2
	SLC1A5	CCNL1	TCF25
	FAM13A	DAP	TRAPPC8
	CXXC1	CXXC1	DESI2
	LAMTOR1	MRPS33	POLR1D
	SMARCA2	RNF20	MSL1
	MRPS33	LAMTOR1	IRF2BPL
	ITGA8	ACADVL	COPS8
	DAP	SMC4	NEK7
	YARS1	FAM13A	BIRC2
	DTX3L	BRD2	UBP1
	CMBL	LMBRD2	OXA1L
	RNF20	HNRNPA0	LSM1
	CAB39	DTX3L	TMEM179B
	LMBRD2	CALCOCO2	SLC25A46
	RBX1	MRPL41	PIK3C2A
	HNRNPA0	CTSB	HSPE1
	CALCOCO2	RBX1	DHX36
	MARCHF8	MARCHF8	CRBN
	MRPL41	C15orf61	TARDBP
	HEBP2	PSMD4	GLUL
	TSG101	TSG101	RGS1
	NOTCH2	CAB39	ACADVL
	C15orf61	SNRPD1	SMIM19
	ANKRD36BP2	CDK4	DDX1
	PNPLA2	ITGA8	SS18L2
	DEPTOR	HEBP2	LSM7
	SMC4	NUDT4	HSD17B8
	CDK4	GSPT1	IARS2
	DHX36	LAMP3	SPPL2A
	NUDT4	ZBTB20	SPSB3
	SNRPD1	PNPLA2	DYNLT1
	TCF25	IL6R	MGAT1
	PSMD4	IGF2R	CD55
	SPSB3	NOTCH2	FBXO7
	GSPT1	DHX36	GFPT1
	OTUD5	ATIC	MBD1
	GTF3C2	SPSB3	PRR11
	GOLGB1	GTF3C2	SACM1L
	LAMP3	ENOPH1	ISCA1
	IL6R	FIS1	ROMO1
	SPPL2A	TCF25	STAT3
	XRN1	CMBL	NUS1
	ENOPH1	ZNF655	IGHM
	TCF12	GOLPH3L	ARGLU1
	ZBTB20	TCF12	NPIPA1
	GOLPH3L	UBA3	GPI
	CHMP4B	SPPL2A	SMARCA2
	WDR1	CHMP2A	SUGT1
	ATIC	TPR	SCAMP2
	HSPB11	UBE2QL1	MDM4
	ZFR	BBX	DAP
	UBA3	XRN1	FGD5-AS1
	IGF2R	OTUD5	BCAS2
	HSPH1	PRKAR2A	IRF9
	CHMP2A	GOLGB1	YARS1
	VAMP8	NEPRO	EIF5B
	FIS1	ZFR	FOXN3
	ZNF655	LSM1	TCF12
	BBX	OAS2	PREB
	KHDC4	ANKRD36BP2	PTPN6
	DMAC1	CHMP4B	CYSLTR1
	BZW1	BZW1	RAP2B
	BTG3	WDR1	PNPLA8
	ROCK1	MFSD6	HSD17B10
	MFSD6	HSPH1	LY9
	FCHSD2	HSPB11	RAP1A
	TEX261	ROCK1	SNRNP200
	PRKAR2A	DMAC1	UBA3
	OAS2	BTG3	TMEM256
	LSM1	SMAP2	IER5
	DPH5	C5orf15	AIM2
	STOM	CDR2	CSGALNACT1
	ARHGAP1	VAMP8	SUZ12
	TPR	TEX261	HDGF
	NEPRO	RAB7A	HECA
	NDUFS8	KHDC4	LIMD1
	DYNC1I2	ARHGAP1	RCN1
	HEIH	FCHSD2	PSMB5
	C5orf15	DYNC1I2	CDR2
	CTSO	PURA	S100A6
	LEPROT	BET1L	EBPL
	MRPL9	ATP11B	CAMTA1
	RAB7A	MAP3K13	NBN
	AFF1	FXR1	CLK1
	CDR2	DPH5	LEPROT
	UBE2QL1	HEIH	MYD88
	BET1L	MRPL9	MFSD6
	SACM1L	LARS1	TRIM44
	ATP11B	NDUFS8	IKZF1
	PURA	LEPROT	TIMM10
	FXR1	STOM	KLF3
	NBPF1	CTSO	DDX18
	LARS1	PBXIP1	BAG6
	MAP3K13	AFF1	CS
	CCNL2	NBPF1	PDLIM1
	OSBP	OSBP	CDK2AP2
	PBXIP1	SACM1L	TXNDC17
	PTPN2	RO60	BZW2
	RO60	DOK3	ALCAM
	EDEM1	PREB	UFD1
	SMAP2	API5	NRAS
	TALDO1	U2AF2	POLR2K
	PREB	CCNL2	ILF3
	DOK3	RNF187	TMEM45A
	RBPJ	AP3M1	TM2D3
	U2AF2	EDEM1	ZNF22
	CYFIP1	VPS26A	DMAC1
	CERK	PTPN2	PGM1
	VPS26A	THOC7	CACYBP
	SUCLG1	CYFIP1	ZDHHC5
	TFRC	SUCLG1	AFF1
	PGM1	CERK	WDR1
	AP3M1	KLF3	DIMT1
	CACYBP	PIGK	COX11
	API5	PGM1	DDB1
	NRAS	RBMS1	LPXN
	NCOA3	UBE2A	LARS1
	THOC7	MBD1	CTSC
	MBD1	TALDO1	API5
	UBE2A	LRRC58	HNRNPA3
	ZCRB1	CLSTN1	ARHGDIA
	LRRC58	RBPJ	UBA5
	CLSTN1	UBA5	DAP3
	AP2S1	TXNDC9	MRPL40
	P2RY8	NRAS	TNFAIP3
	UBA5	ZCRB1	ATIC
	RBMS1	SS18L2	JMY
	MRPL47	CACYBP	SLC35B3
	PTEN	NCSTN	TLNRD1
	CREBL2	UBP1	PBXIP1
	PIGK	FLI1	POP4
	SS18L2	DDX46	EIF2AK2
	TXNDC9	P2RY8	KRCC1
	PSMB5	MRPL47	GNPAT
	RNF187	TFRC	MX1
	NCSTN	CREBL2	PSMC1
	ZNF22	C11orf1	RNF7
	CELF1	PSMB5	MLH1
	GNPAT	PTEN	PTEN
	P4HTM	GNPAT	CDK17
	C11orf1	P4HTM	SNRPD3
	UBP1	ZNF22	TFRC
	TMEM45A	SCOC	ITGA8
	KLF3	AP2S1	ARID1A
	PSMC1	SNRNP27	MRPL49
	SNRNP27	CELF1	SNX6
	DDX46	PCGF5	MARCHF8
	FLI1	NCOA3	RPA2
	SCOC	PSMC1	DPP7
	VAMP3	PSMC6	MRPS36
	PACS2	SF3B4	IGF2R
	PAX8	VAMP3	SLC30A5
	CARD8	TNIP1	GOLGA7
	FCRL2	MSL1	ALOX5
	TXNDC17	CARD8	HEIH
	USP32	PACS2	SQOR
	PCGF5	USP32	GDI1
	ARGLU1	AIG1	BTN3A2
	TNIP1	NUCB1	ATRX
	SF3B4	PAX8	SIL1
	CUEDC2	LIMD1	CYB5R1
	PSMC6	TM2D3	TMEM87A
	NUCB1	TMEM131	COMMD1
	E2F4	PSMC5	MAP1LC3B
	RCN1	TXNDC17	ZNF655
	PTTG1	FCRL2	YTHDF3
	MSL1	CUEDC2	PSMC5
	TMEM131	TMEM45A	SKIL
	FASTK	HSPE1	SRRM2
	AIG1	HNRNPUL1	TMEM9B
	RNF7	E2F4	HECTD1
	RNF114	RCN1	NBR1
	TMEM263	ARGLU1	PSMB8
	SRRT	RNF7	ADM
	HSPE1	FASTK	CHAC2
	LIMD1	PSME3	DYNC1I2
	MAP1LC3B	TMEM263	ST3GAL6
	MIA3	ARF3	CDC26
	PSMC5	RNF114	GNAI3
	BIRC2	LRRC47	MAP3K13
	UGGT1	MCTS1	FCHSD2
	TM2D3	MIA3	TIMMDC1
	HNRNPUL1	MAP1LC3B	GOLGA4
	MCTS1	UGGT1	COPS4
	LRRC47	SRRT	STK17B
	ARF3	TMEM109	MRPL15
	PSME3	CNIH4	CDK4
	RAD17	BIRC2	SDE2
	TRIM4	PTTG1	TM9SF1
	SHLD2	PTK2B	TXNDC9
	LINC00944	SDE2	ARPC1B
	COMMD1	CDK14	ZFP91
	EIF4A3	MPC2	MPC2
	TNFAIP3	COMMD1	KHDC4
	HECTD1	BAG1	HNRNPH3
	TMEM109	ZNF91	HSPH1
	SLC25A46	HECTD1	JKAMP
	MPC2	SLC25A46	SRRT
	USP3	MYL12A	CCNH
	MYL12A	SHLD2	TM9SF4
	CDK14	RAD17	APOBEC3G
	CRBN	EIF4A3	PNOC
	CNIH4	USP3	FLOT1
	BAG1	IKZF1	CUEDC2
	BCAS2	CRBN	ROCK1
	SDE2	NEK7	LOC105370109
	BZW2	C16orf72	SNRNP27
	DDX39A	ISCA1	CNOT1
	PIGT	TNFAIP3	NBPF1
	POLR2G	SLC30A5	STAP1
	ISCA1	BZW2	SEPTIN10
	WDR33	WDR33	LRPAP1
	HSD17B10	CHTF8	DCTN4
	SUZ12	COPS8	NEPRO
	C16orf72	SUZ12	RNASEH2C
	CHTF8	YTHDF3	WDR33
	CYB5R1	CYB5R1	HLTF
	IKZF1	SLC25A39	FUCA1
	SLC25A39	POLR2G	CRLS1
	NEK7	CHMP5	NIFK
	CASP1	PIGT	CCDC47
	SLC30A5	BCAS2	USP9X
	PTK2B	CDK2AP2	ATP11B
	ZNF91	HSD17B10	CARMIL1
	PPP2R5C	DDX39A	GSTK1
	COPS8	CASP1	TFB2M
	YTHDF3	HPCAL1	GOLGA5
	R3HDM1	TMEM39A	DDX46
	ZNF548	RCSD1	BTBD1
	CHMP5	PPP2R5C	CHMP4B
	TMEM39A	TM9SF1	TMEM131
	GNAI3	JMY	GOLGB1
	JMY	R3HDM1	DPY30
	CDK2AP2	VSIR	LRRFIP1
	ST6GALNAC4	ST6GALNAC4	SHLD2
	PSMD1	ATAD1	PTBP3
	POLR1D	DNAJB1	PPP1CA
	VSIR	TRIM4	ABHD14A
	DNAJB1	MTMR12	C16orf72
	MTMR12	GNAI3	POLR2G
	HPCAL1	POLR1D	GGH
	HNRNPA3	ATXN7L3B	CCT7
	VPS35	CPSF7	EI24
	IGLV@	CCDC47	MIEF1
	RBM17	LINC00944	MPC1
	CPSF7	PSMD1	ALDH18A1
	OSBPL10	VPS35	DENR
	FAM117A	COX11	AP3M1
	ATXN7L3B	GLTP	AP2S1
	CCDC47	SYNE3	TPR
	PSMA7	CLK1	MTMR12
	ZMAT2	SEPTIN10	MRPL18
	FKBP1A	PPP1CA	IGHD
	TM9SF1	HNRNPA3	SMARCE1
	PTBP3	ZMAT2	CYFIP1
	CD55	MRPS14	MIS12
	COX11	RAF1	MRPL54
	GOLGA4	HSD17B8	NDUFA9
	CDK17	RBM17	ADNP
	GLTP	GOLGA4	LBR
	CLK1	SREK1	SLTM
	ECHDC1	FKBP1A	PPP2R5C
	ATAD1	ECHDC1	IGLV@
	RCSD1	LRRC8D	TMEM109
	SREK1	PTBP3	TMEM165
	LOC105379173	CDK17	ERO1A
	SEPTIN10	GOLGA7	SCAMP5
	RAF1	USF2	CREBL2
	FGD2	ABHD14A	NENF
	AIM2	PPP3CB	SNAPC5
	LRRC8D	PSMA7	LSM3
	MRPS14	CDC26	PAFAH1B2
	PRR11	CD55	SINHCAF
	PPP3CB	FAM117A	R3HDM1
	SYNE3	LBR	HNRNPUL1
	MRPS31	ZNF548	GOLPH3L
	ARHGEF12	LOC105379173	ITGA6
	UHRF2	UHRF2	ABI1
	GOLGA7	IER5	VPS35
	TAP2	AIM2	HSD17B4
	HSD17B8	PSMB8	ATAD1
	PPP1CA	OSBPL10	AFG3L2
	LBR	PABIR2	FH
	CDC26	HDAC9	USP3
	TMEM256	PGRMC1	CASP1
	ABHD14A	ARHGEF12	RELA
	C16orf54	TAP2	SREK1
	MRPL40	TMEM256	EIF4A3
	HLTF	IMP3	COMMD8
	PGRMC1	PIEZO1	METAP2
	GOLGA2	HLTF	CDC42SE1
	DGUOK	ARF6	NAA38
	USF2	MRPL40	SLC33A1
	SLC39A9	GOLGA2	FASTK
	PABIR2	MIS12	ALKBH7
	HDAC9	SLC39A9	PPP3CA
	SELPLG	C16orf54	CCNL2
	N4BP1	DDX1	BAG1
	PIEZO1	FDFT1	TMED3
	DPP7	MRPS31	OSBPL10
	PSMB8	DGUOK	ARV1
	IMP3	RNF145	AHCYL1
	ARF6	SKIL	TAP2
	KLHL9	CSGALNACT1	TVP23B
	MOB1A	MOB1A	ARF6
	PSMD2	UPF3A	SUMO4
	SUGT1	NUP50	UROD
	DDX1	PRPS1	RNF145
	UPF3A	KLHL9	MRPS14
	IER5	ERAP2	SPG11
	MIS12	FGD2	ARHGEF12
	SP100	DPP7	PPIL3
	NUP50	PSMD2	CXXC1
	SKIL	ABI1	URI1
	PRPS1	SELPLG	FDFT1
	FDFT1	N4BP1	WDR45
	RAP1A	RPRD2	ZBTB8OS
	SNRNP70	BCL2L11	AMD1
	FUCA1	PRR11	PRPF8
	RNF145	CHAC2	TM2D1
	CTHRC1	ORMDL3	ETFRF1
	MCCC2	SP100	PCMT1
	ITGA6	BTBD1	SCFD1
	ZNF638	ZNF638	NOTCH2
	PPDPF	SUGT1	ST8SIA4
	ORMDL3	AP2M1	UGGT1
	BCL2L11	DIMT1	CBX7
	CSGALNACT1	SNRNP70	CETN3
	BASP1	PPIL3	PGRMC2
	CHAC2	PPDPF	FAM117A
	ROMO1	HNRNPH3	SH2B2
	SIL1	MCCC2	DPP8
	HNRNPH3	SPG11	UBQLN2
	BTBD1	NOA1	SF1
	UBE2Z	LSR	KDELR3
	PPIL3	ABHD14B	PSMD2
	ABI1	USP22	RAB7A
	NOA1	MFSD14B	CCDC69
	SNX6	METAP2	FAM120AOS
	DIMT1	ZCCHC7	FAXDC2
	MRPL18	RAP1A	SP100
	AP2M1	TIMMDC1	RPA3
	AGPAT1	MRPL18	DPH5
	TIMMDC1	CPSF6	PLEKHA2
	MFSD14B	AGPAT1	ANKRD46
	ERAP2	UBE2Z	NUP50
	SPG11	UBLCP1	P4HTM
	TIMM10	JKAMP	ZNF770
	ZCCHC7	TIMM10	CCDC50
	USP22	SIL1	ZBTB20
	RPRD2	SNX6	PPM1B
	JKAMP	SLTM	ACTR10
	CAMTA1	MRPL15	TDP2
	CYB5R3	IST1	RNF149
	ALOX5	ALCAM	CPSF6
	METAP2	CAMTA1	PGRMC1
	DCAF7	RNF4	TRAPPC3
	SRSF4	ROMO1	WDR26
	IGBP1	MRPL34	IFT20
	CCNH	SRSF4	GTF3C2
	IST1	ITGA6	CISD2
	RNF4	DCAF7	CYC1
	ABHD14B	TFB2M	ERAP2
	VPS52	PNPLA8	ACO2
	LAMP5	CYB5R3	HDAC2
	CPSF6	GGH	ECPAS
	KDELR3	IGBP1	RUBCN
	PNPLA8	CCNH	RPF1
	SLTM	CBX7	TWF1
	GOLGA5	ALOX5	PMPCB
	PIH1D1	FUCA1	CYB5R3
	GGH	IRF2	PABIR2
	G6PC3	VPS52	COPS5
	BRI3	GOLGA5	TMEM39A
	AIP	G6PC3	SLC66A3
	MRPL34	ADNP	LGALS3
	CBX7	AIP	SUMF2
	NDUFS4	PIH1D1	DGUOK
	ALCAM	SUMF2	PIGT
	MRPL15	URI1	SPOP
	TFB2M	SUMO4	ARMC1
	ALDH2	ARV1	NDUFA8
	POP4	NUP153	MTRR
	IRF2	NDUFS4	CSRP1
	FH	LAMP5	USP48
	ARV1	POP4	DOK3
	SUMF2	PREPL	ZHX2
	UBLCP1	TMPO	MOB1A
	CD79A	BIRC6	HNRNPL
	GSTK1	DCAF13	CEP350
	CIAO2B	SMNDC1	IGBP1
	NUP153	BASP1	GRSF1
	SMNDC1	FH	PARM1
	SUMO4	CRLS1	ATP5MC1
	BIRC6	SMARCE1	PSMB8-AS1
	LSR	AHCYL1	GGA1
	ADNP	PCMT1	CARD8
	PCMT1	BRI3	DCAF13
	CRLS1	ST3GAL6	EGLN1
	URI1	LSM4	RNF187
	STX17-DT	DAP3	UPF3A
	PREPL	CIAO2B	LRRC58
	WDR45B	PPA2	CALCOCO2
	LMF2	SHISA5	ARHGAP1
	TMPO	ALDH2	PSMD8
	DENR	ANKRD13A	CKS2
	LSM4	APH1A	RAP2C
	ANKRD13A	IGLV@	ZNF91
	AHCYL1	COPS4	DAZAP1
	DCAF13	NBR1	RAF1
	ADM	ANKRD46	USP22
	PPA2	WDR45B	MICU2
	SMARCE1	GSTK1	RAB18
	H2BC21	DENR	RBM17
	HNRNPL	CD200	DNAJB1
	ANKRD46	COMMD8	GLTP
	SHISA5	RUBCN	CDK14
	COPS4	H2BC21	TRIM28
	PMPCB	DPY30	BSG
	ST3GAL6	ST8SIA4	ENY2
	DAP3	EIF4G1	AUP1
	NBR1	CTHRC1	OSBP
	DPY30	CSRP1	SLC39A9
	EIF4G1	SQOR	CASP3
	COMMD8	LMF2	NDUFV3
	RUBCN	IPO8	ZMAT2
	CTSC	EOLA1	PTTG1
	MPRIP	MPRIP	COX20
	IPO8	STX17-DT	CD200
	APH1A	GRSF1	SNW1
	SQOR	FHL1	NOA1
	CSRP1	DLG1	PCNA
	GOLGA8A	PMPCB	GOLGA8A
	SPEN	SYF2	IFI6
	GRSF1	INTS8	BCL2L11
	PPM1B	KDELR3	BBX
	NDUFV3	PPM1B	PPTC7
	SYF2	CD79A	CYP2R1
	EOLA1	NDUFV3	MSI2
	SLC33A1	HNRNPL	FOLR1
	ST8SIA4	SPEN	LINC01210
	MKRN1	CSNK1G3	EIF5A
	PPP3CA	PPP3CA	GINM1
	LOC105370109	MKRN1	GCSH
	CSNK1G3	MRPS36	RIOX2
	DLG1	CAPZB	WDR45B
	INTS8	ADH5	HIKESHI
	CAPZB	LOC105370109	ATXN7L3B
	IGLJ3	SLC33A1	BIRC3
	FHL1	ATP13A1	TRAPPC4
	ADH5	AFG3L2	RNF20
	AFG3L2	ZFAND1	ZDHHC2
	SMIM12	OSBPL8	ESD
	ARPC1B	PKM	RTCA
	MRPS36	DCTN4	NDUFS4
	ATP13A1	AP1S2	BTN3A1
	CD200	SNAPC5	GFM1
	DYNLT1	SMIM12	RAB9A
	CCDC50	IGF1	U2SURP
	OSBPL8	GOLGA8A	DLD
	FGD5-AS1	ADM	HDAC9
	DDX18	RMDN3	EGR1
	SPATS2	ABCE1	PWP1
[truncated: 18,863 more rows]
